# Supplementary material for: Novel ruthenium(II) and iridium(III) BODIPY dyes: insights into their application in photodynamic therapy in vitro
Source: Royal Society of Chemistry journal article supplement (doi:10.1039/c9pp00201d), 2019-06-28
Supplement: c9pp00201d1.pdf [file c9pp00201d1.pdf]

## **ELECTRONIC SUPPLEMENTARY INFORMATION**

### **Novel Ruthenium(II) and Iridium(III) BODIPY Dyes: insights into their application in vitro Photodynamic Therapy**

Nuray Esra Aksakal, Esra Tanriverdi Eçik\*, Hasan Hüseyin Kazan, Gönül Yenilmez Çiftçi,

Fatma Yuksel\*

## Table of Contents

|                                                                                                                                                    |    |
|----------------------------------------------------------------------------------------------------------------------------------------------------|----|
| <b>Fig. S1</b> MALDI-TOF spectrum of <b>BD</b> .....                                                                                               | 3  |
| <b>Fig. S2</b> FT-IR spectrum of <b>BD</b> .....                                                                                                   | 3  |
| <b>Fig. S3</b> <sup>1</sup> H-NMR spectrum of <b>BD</b> .....                                                                                      | 4  |
| <b>Fig. S4</b> <sup>13</sup> C-NMR spectrum of <b>BD</b> .....                                                                                     | 4  |
| <b>Fig. S5</b> MALDI-TOF spectrum of <b>4</b> .....                                                                                                | 5  |
| <b>Fig. S6</b> MALDI-TOF spectrum of <b>Ru- BD</b> .....                                                                                           | 5  |
| <b>Fig. S7</b> FT-IR spectrum of <b>Ru- BD</b> .....                                                                                               | 6  |
| <b>Fig. S8</b> <sup>1</sup> H-NMR spectrum of <b>Ru-BD</b> .....                                                                                   | 6  |
| <b>Fig. S9</b> Aromatic region of <sup>1</sup> H-NMR spectrum of <b>Ru-BD</b> .....                                                                | 7  |
| <b>Fig. S10</b> <sup>13</sup> C-NMR spectrum of <b>Ru-BD</b> .....                                                                                 | 7  |
| <b>Fig. S11</b> MALDI-TOF spectrum of <b>Ir- BD</b> .....                                                                                          | 8  |
| <b>Fig. S12</b> ATR-IR spectrum of <b>Ir- BD</b> .....                                                                                             | 8  |
| <b>Fig. S13</b> <sup>1</sup> H-NMR spectrum of <b>Ir-BD</b> .....                                                                                  | 9  |
| <b>Fig. S14</b> Aromatic region of <sup>1</sup> H-NMR spectrum of <b>Ir-BD</b> .....                                                               | 9  |
| <b>Fig. S15</b> <sup>13</sup> C-NMR spectrum of <b>Ir-BD</b> .....                                                                                 | 10 |
| <b>Fig. S16</b> The angle between the planes of BODIPY and phenol ring in <b>BD</b> .....                                                          | 12 |
| <b>Fig. S17</b> UV-vis spectrum of methylene blue in DMSO.....                                                                                     | 12 |
| <b>Fig. S18</b> UV-vis spectrum of <b>BD</b> in DMSO.....                                                                                          | 13 |
| <b>Fig. S19</b> UV-vis spectra of <b>BD</b> in DMSO at different concentrations between $2.5 \times 10^{-6}$ M and $0.5 \times 10^{-6}$ M. ....    | 13 |
| <b>Fig. S20</b> UV-vis spectra of <b>Ru-BD</b> in DMSO at different concentrations between $2.5 \times 10^{-6}$ M and $0.5 \times 10^{-6}$ M. .... | 14 |
| <b>Fig. S21</b> UV-vis spectra of <b>Ir-BD</b> in DMSO at different concentrations between $2.5 \times 10^{-6}$ M and $0.5 \times 10^{-6}$ M. .... | 14 |
| <b>Fig. S22</b> Lifetime spectra of <b>BD</b> .....                                                                                                | 15 |
| <b>Fig. S23</b> Lifetime spectra of <b>Ru-BD</b> .....                                                                                             | 15 |
| <b>Fig. S24</b> Lifetime spectra of <b>Ir-BD</b> . ....                                                                                            | 16 |
| <b>Table S1</b> The selected bond and conformational parameters for <b>BD</b> and <b>3</b> .....                                                   | 11 |

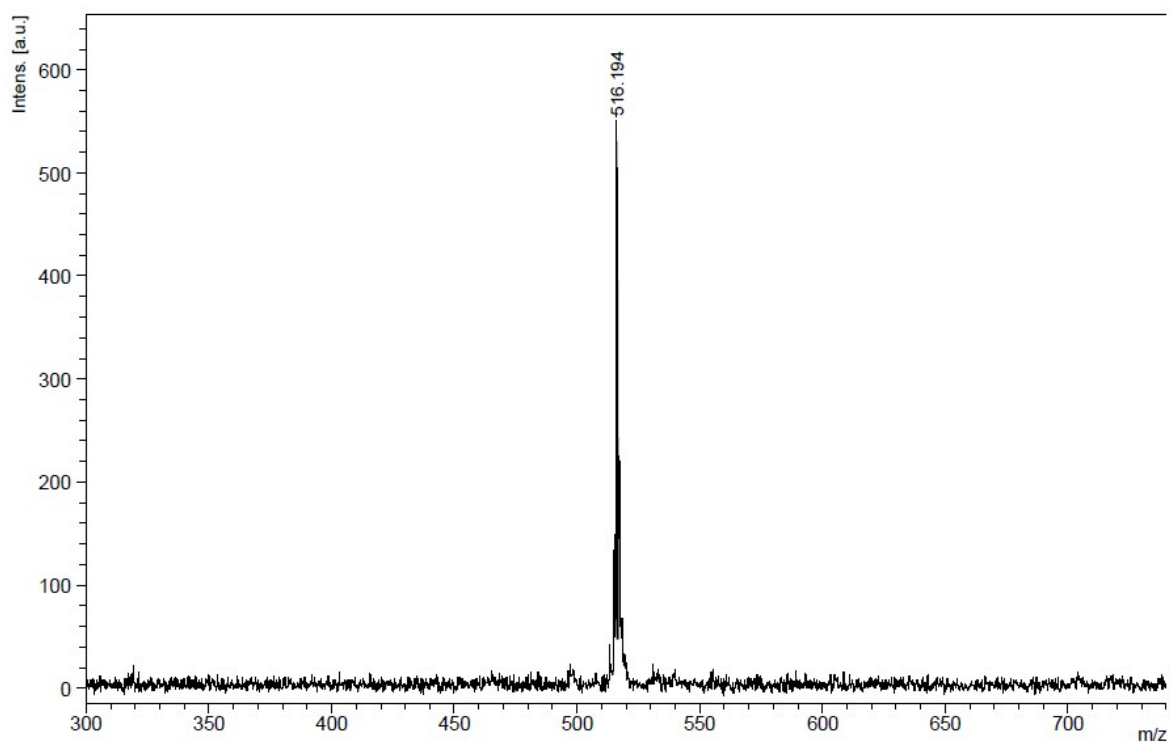

Fig. S1 MALDI-TOF spectrum of BD.

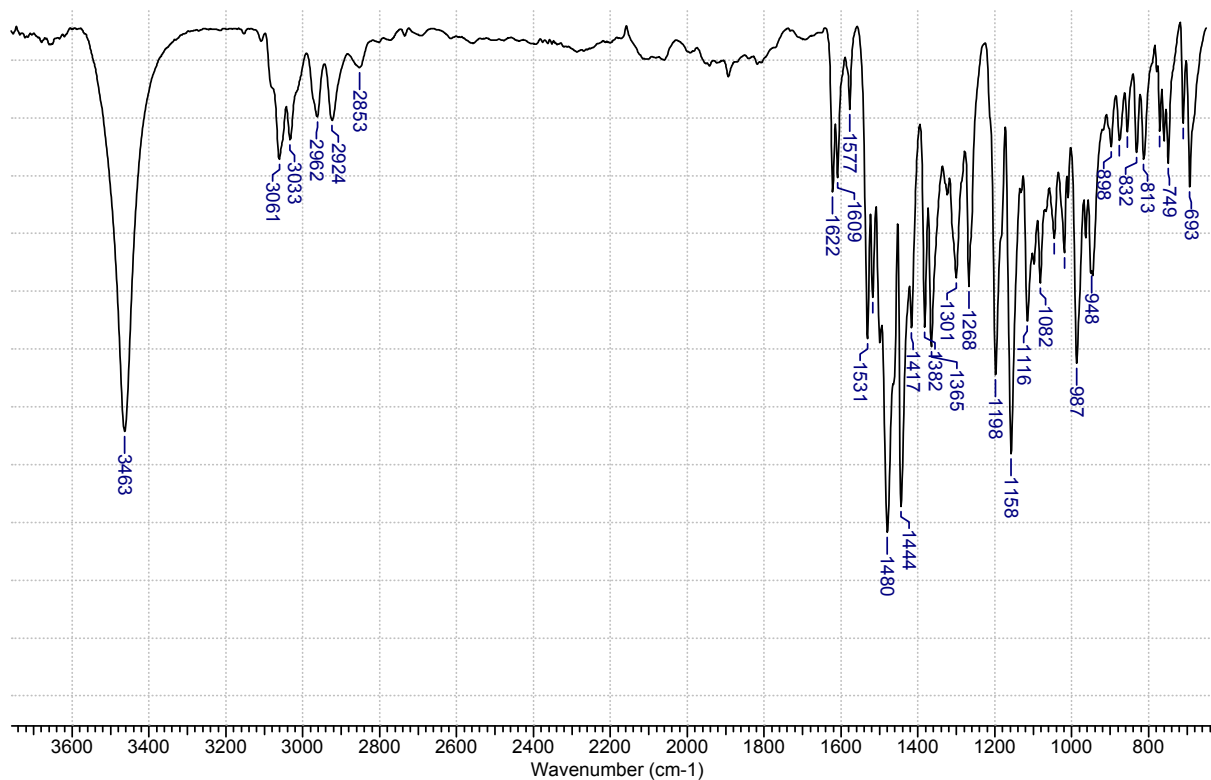

Fig. S2 FT-IR Spectrum of BD.

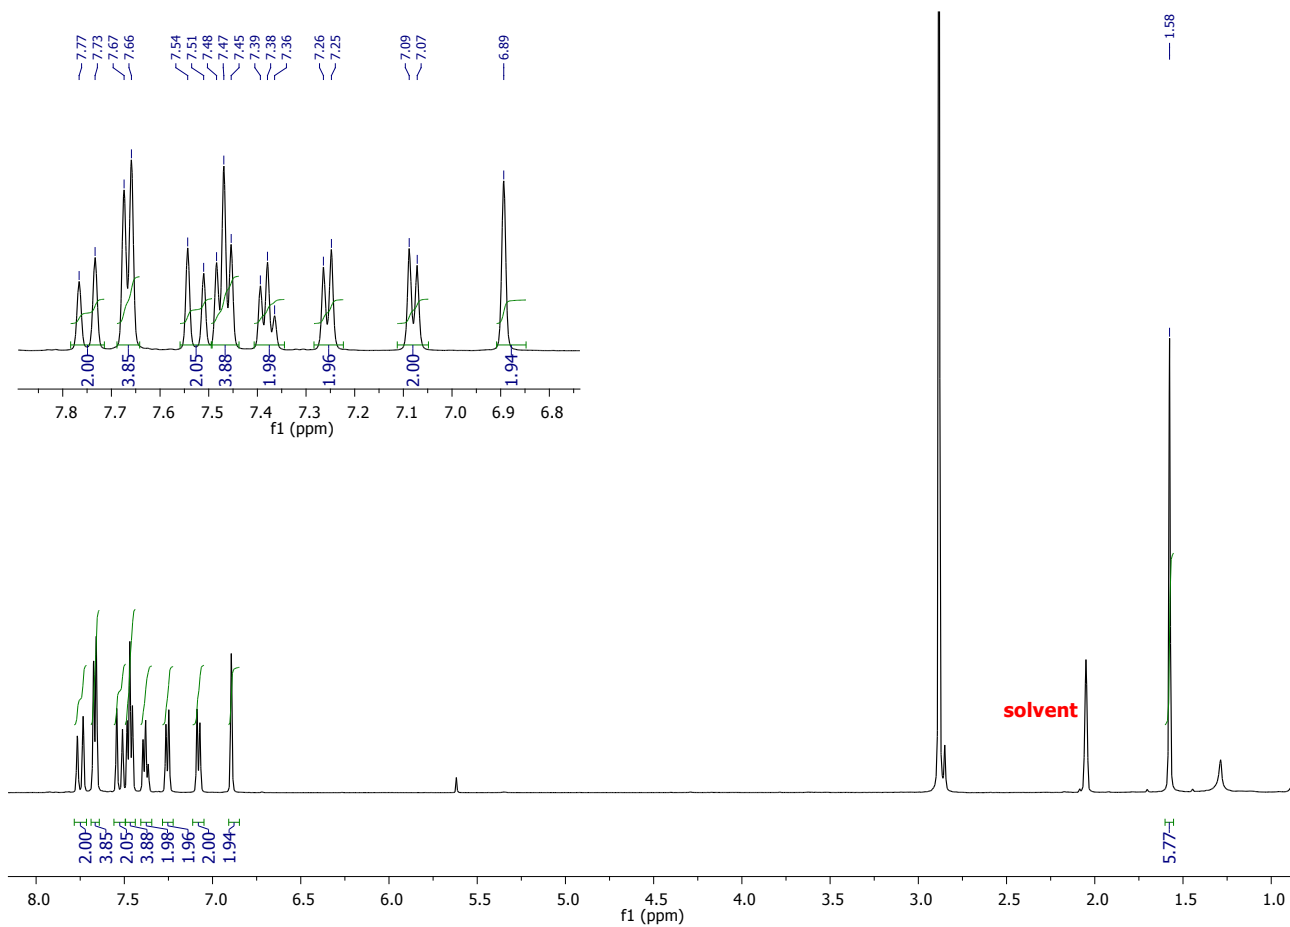

Fig. S3  $^1\text{H-NMR}$  spectrum of BD.

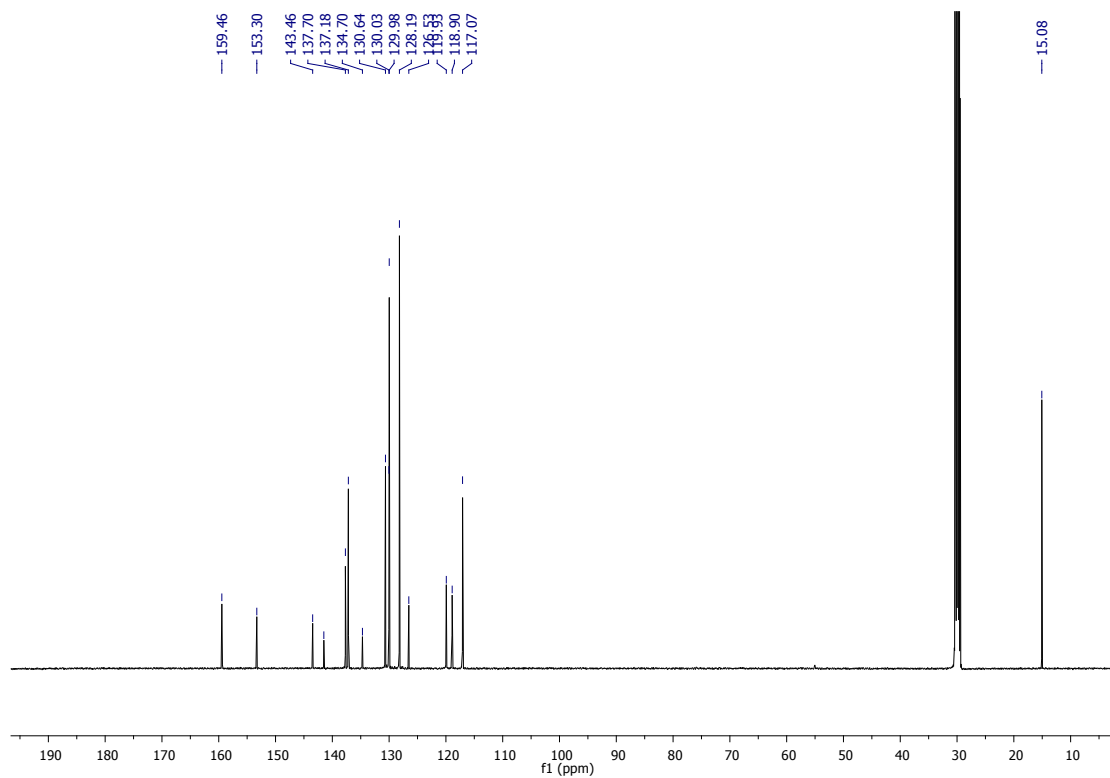

**Fig. S4**  $^{13}\text{C}$ -NMR spectrum of **BD**.

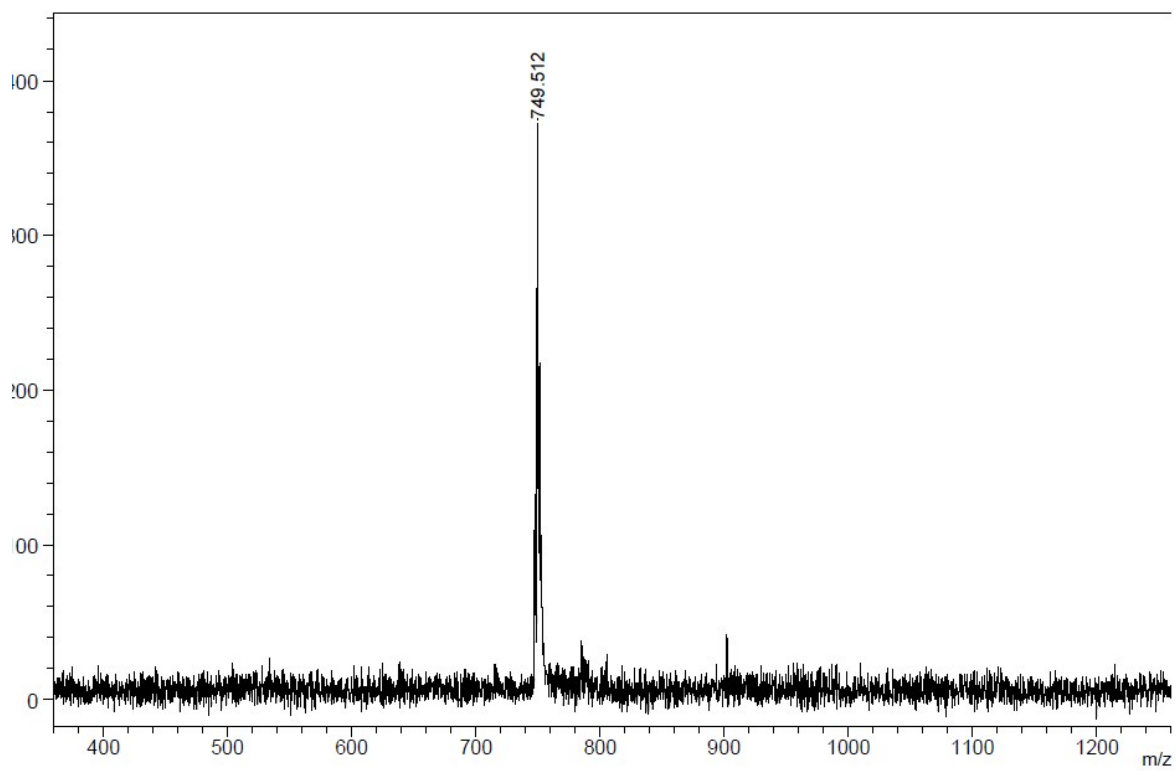

**Fig. S5** MALDI-TOF spectrum of **4**.

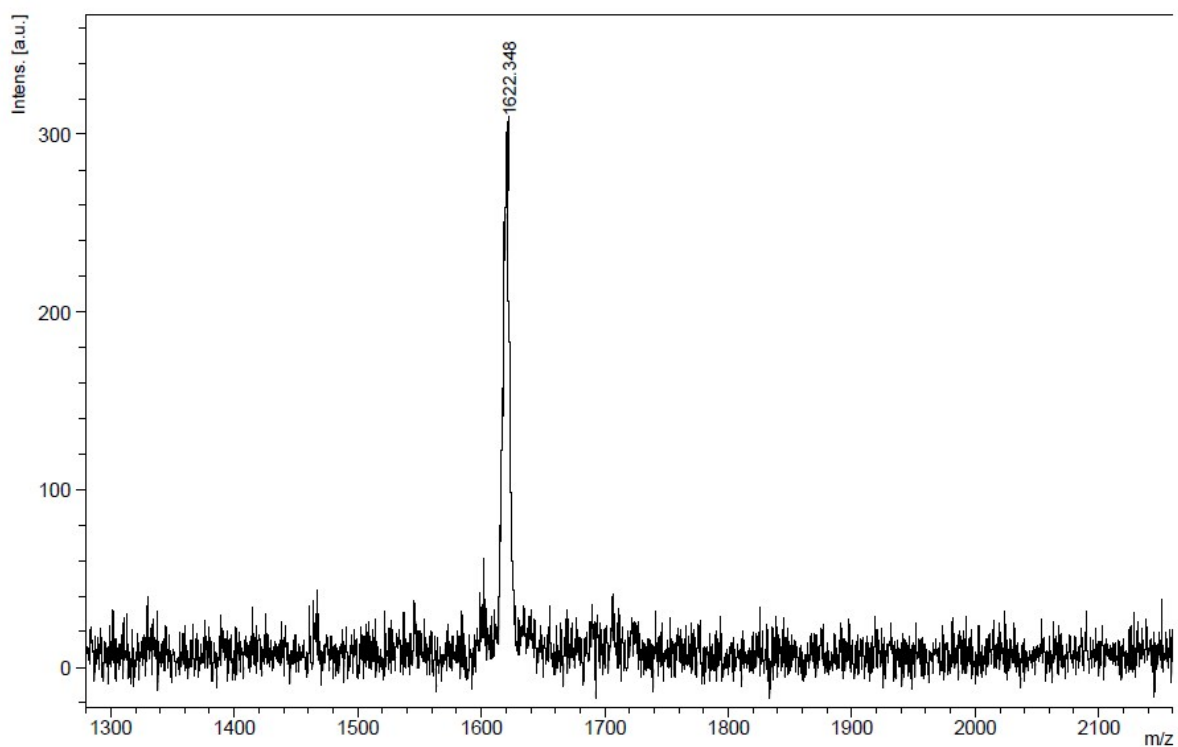

Fig. S6 MALDI-TOF spectrum of Ru- BD.

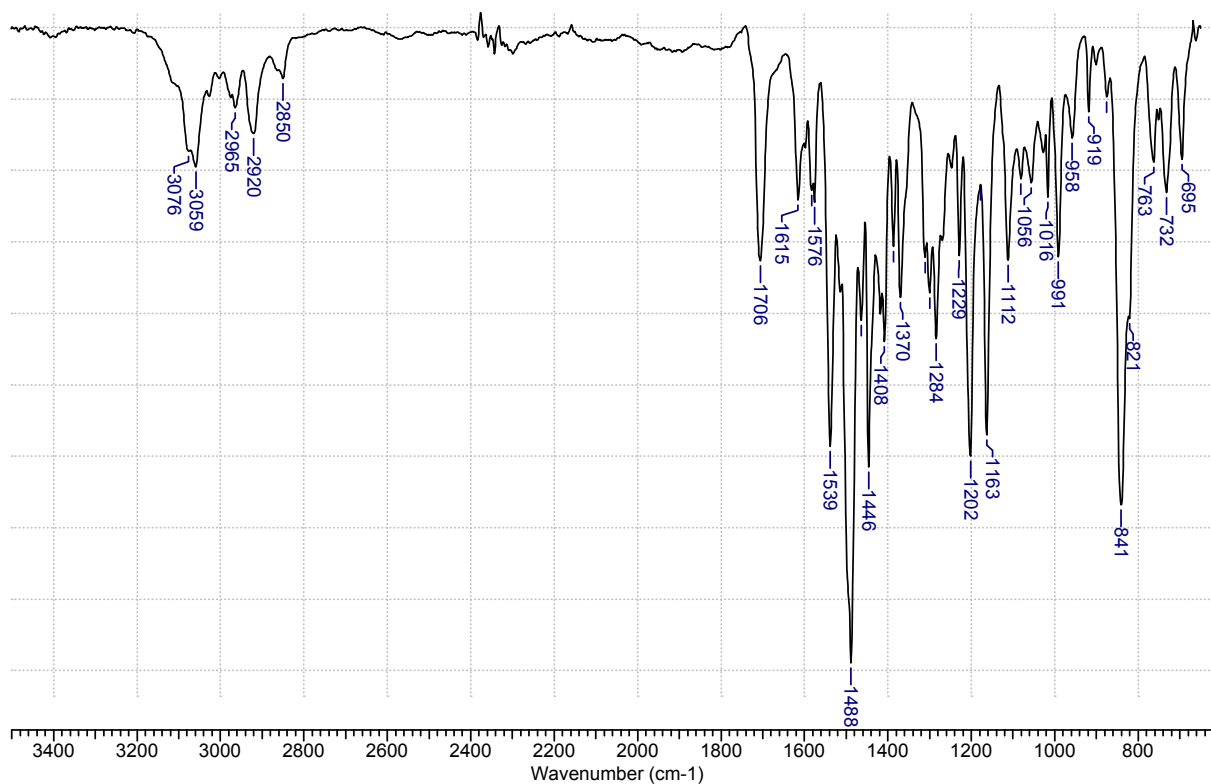

Fig. S7 FT-IR Spectrum of Ru- BD.

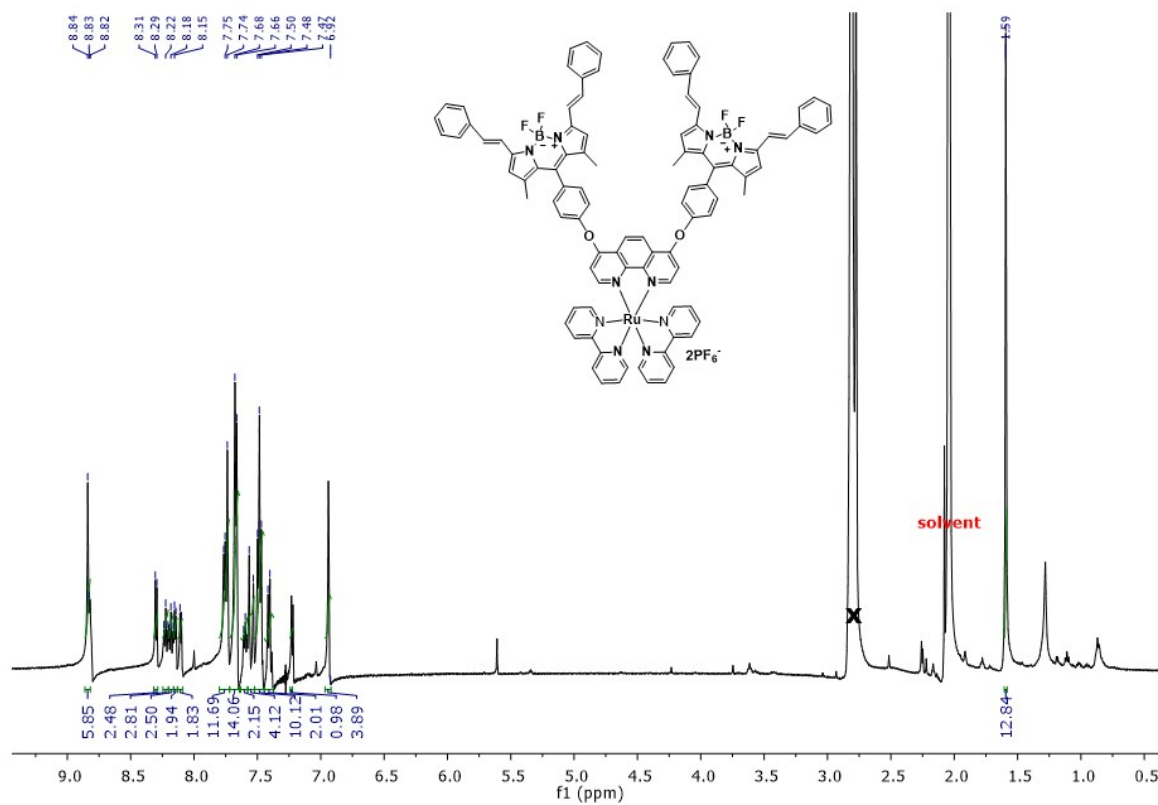

Fig. S8 <sup>1</sup>H-NMR spectrum of Ru-BD.

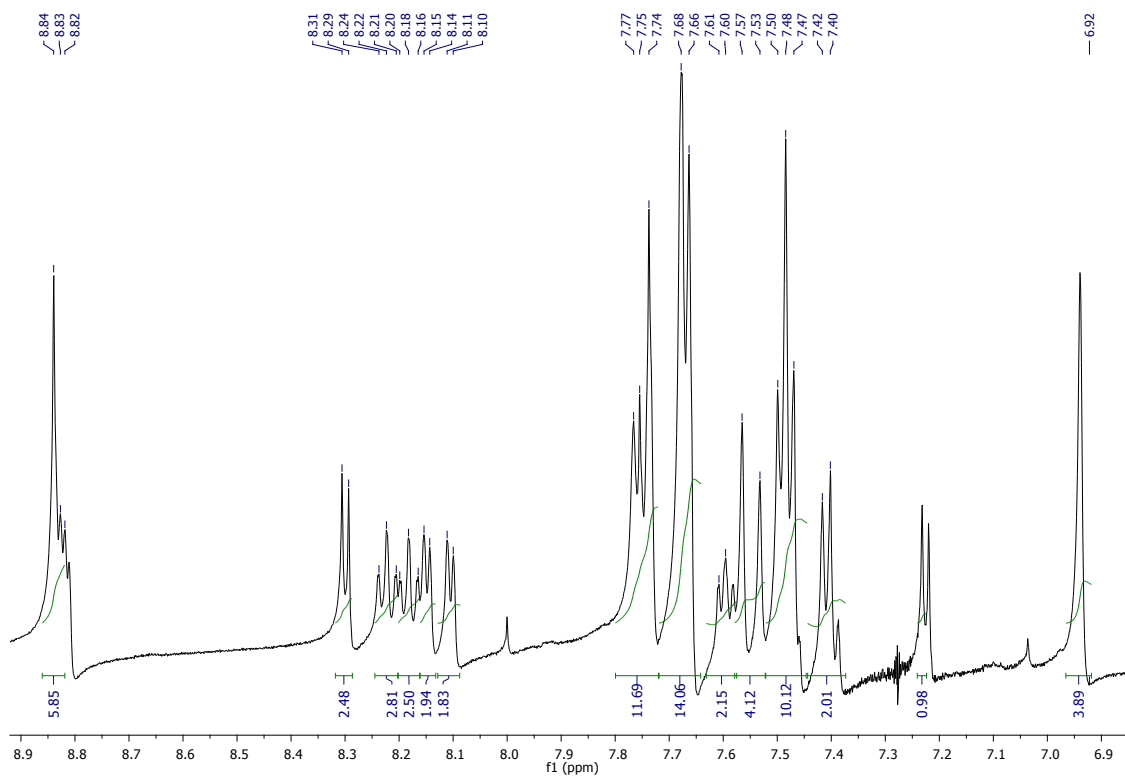

Fig. S9 Aromatic region of <sup>1</sup>H-NMR spectrum of Ru-BD.

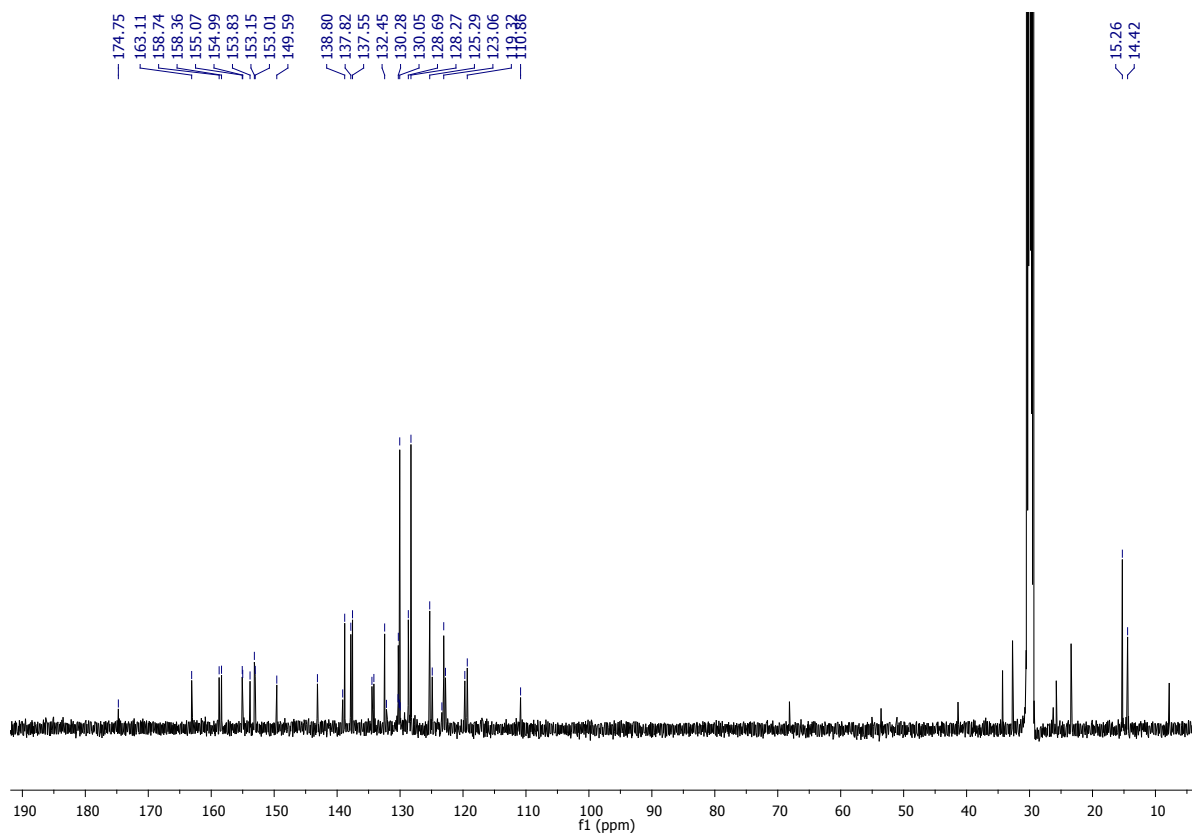

**Fig. S10**  $^{13}\text{C}$ -NMR spectrum of Ru-BD.

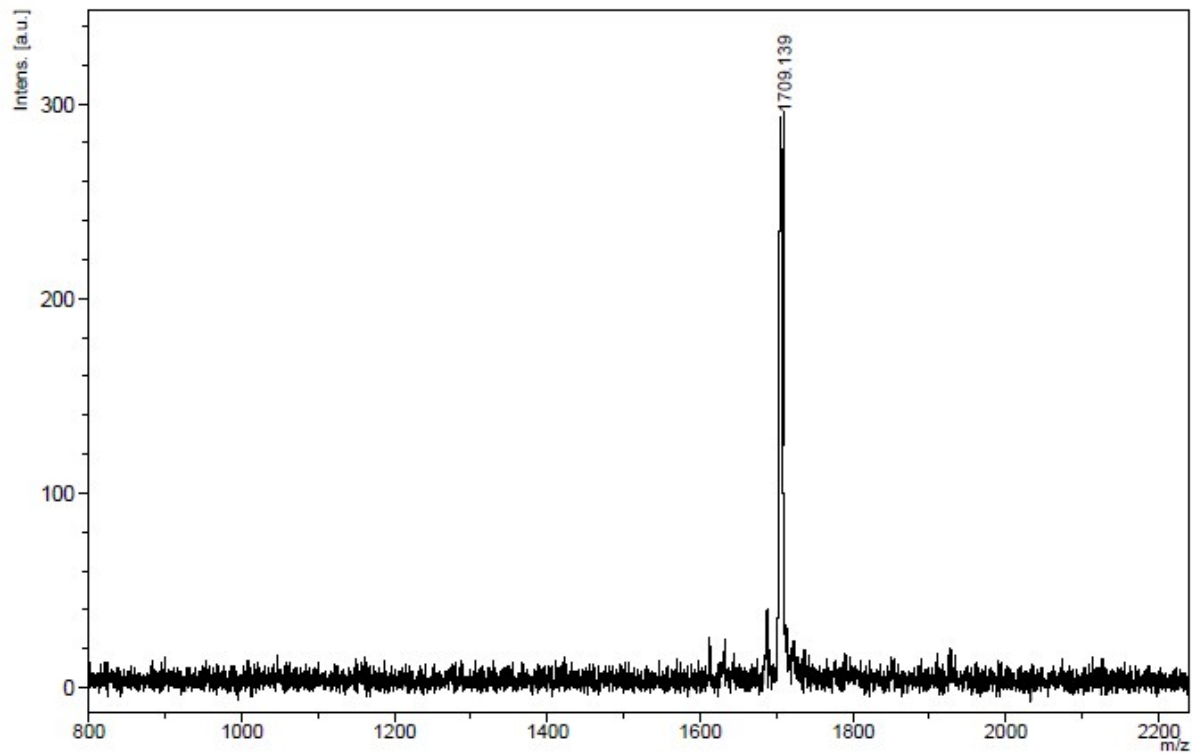

**Fig. S11** MALDI-TOF spectrum of Ir-BD.



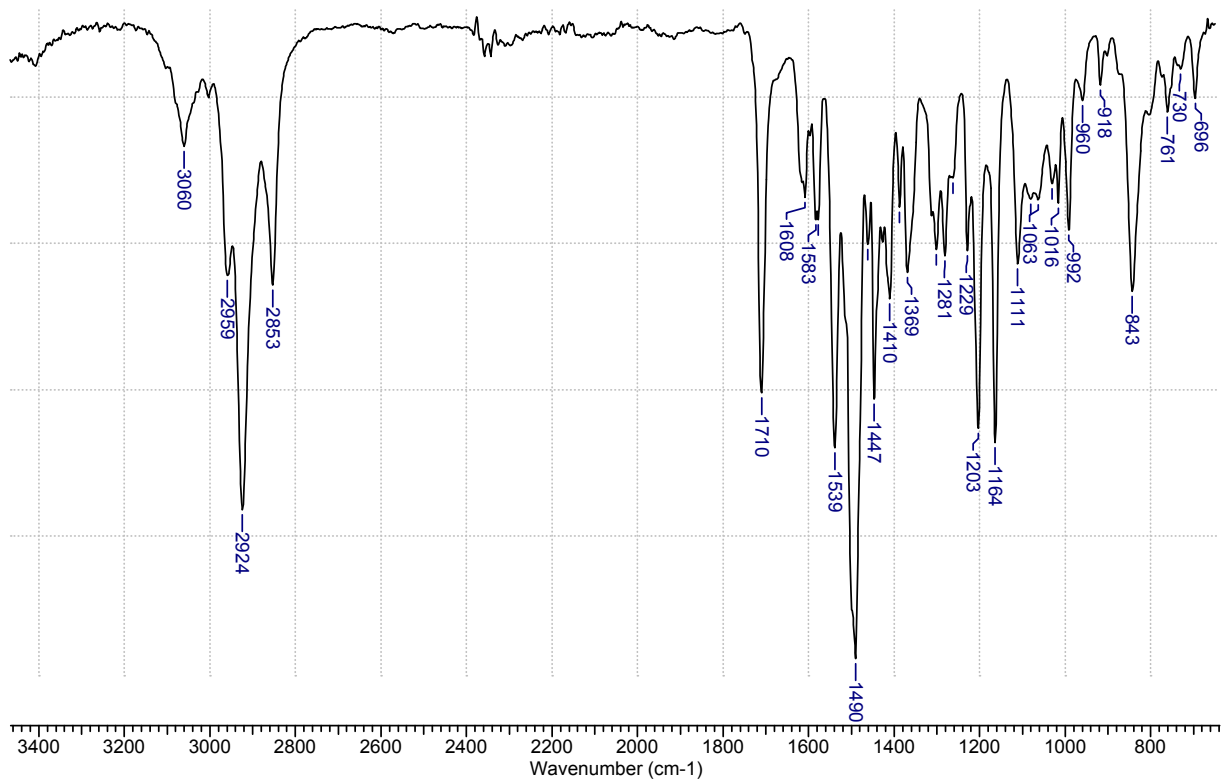

Fig. S12 FT-IR Spectrum of Ir-BD.

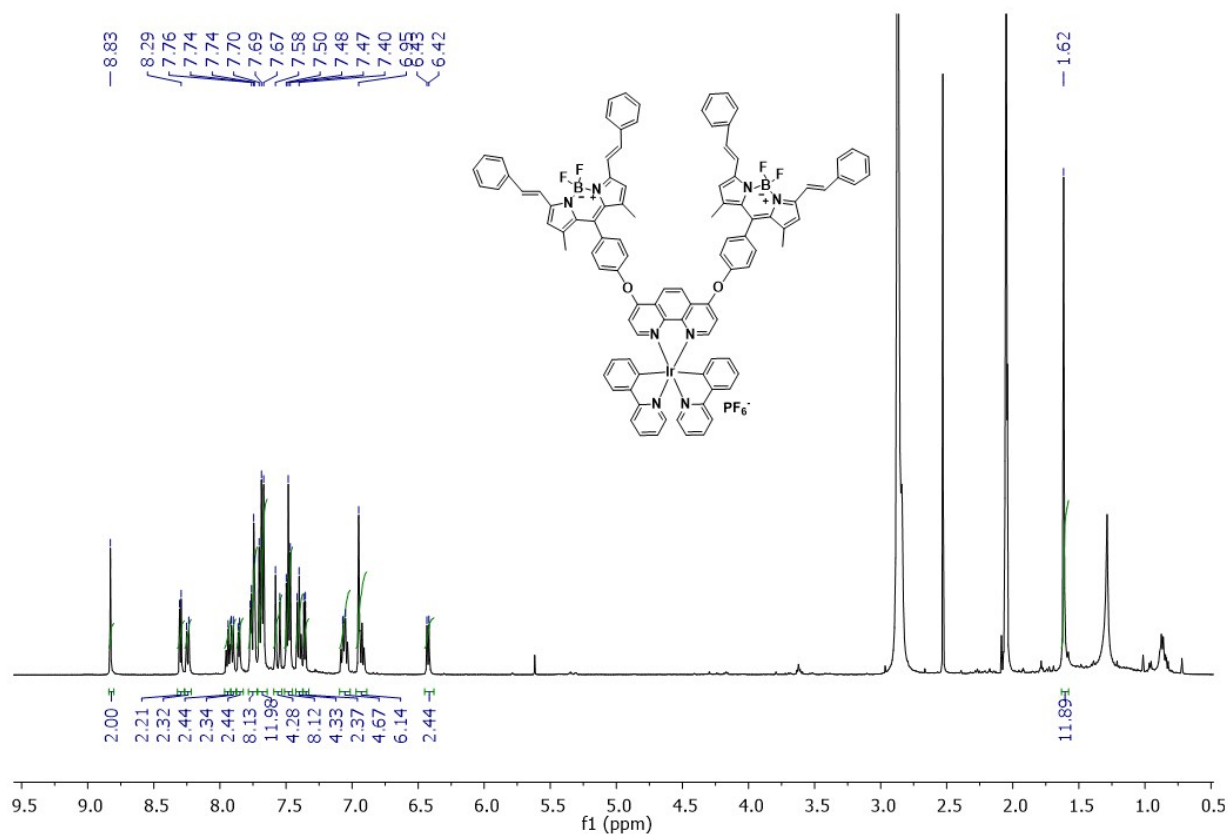

Fig. S13 <sup>1</sup>H-NMR spectrum of Ir-BD.

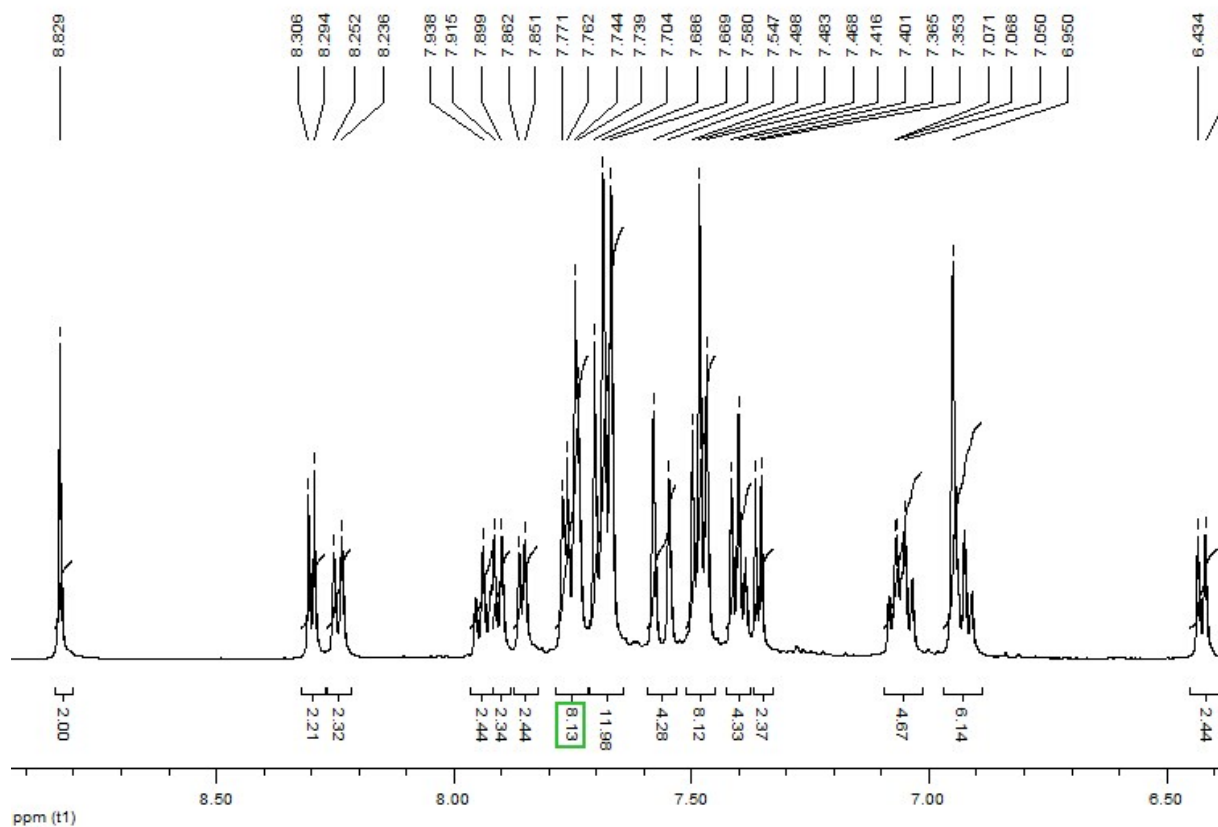

Fig. S14. Aromatic region of <sup>1</sup>H-NMR spectrum of Ir-BD.

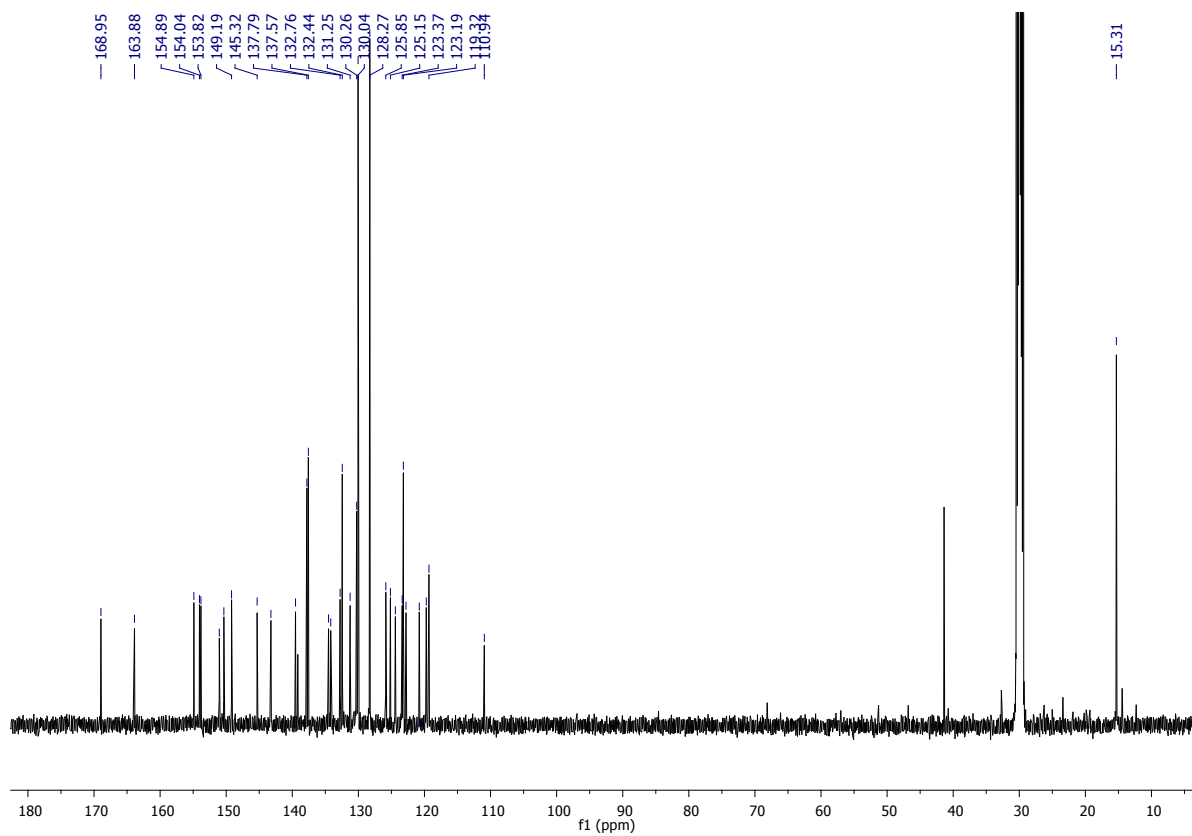

Fig. S15 <sup>13</sup>C-NMR spectrum of Ir-BD.

**Table S1.** The selected bond and conformational parameters for **BD** and **3**

| <b>BD</b>     |            | <b>3</b>   |            |
|---------------|------------|------------|------------|
| B1—F1         | 1.405 (4)  | Ru1-N1     | 2.061 (4)  |
| B1—F2         | 1.393 (4)  | Ru1-N2     | 2.075 (4)  |
| B1—N1         | 1.540 (4)  | Ru1-N3     | 2.065 (4)  |
| B1—N2         | 1.521 (4)  | Ru1-N4     | 2.064 (4)  |
| C1-C18        | 1.436 (4)  | Ru1-N5     | 2.064 (4)  |
| C3-C27        | 1.491 (5)  | Ru1-N6     | 2.059 (4)  |
| C5-C28        | 1.485 (4)  | C3-Cl1     | 1702 (5)   |
| C7-C26        | 1.492 (4)  | C8- Cl2    | 1720 (5)   |
| C9-C10        | 1.427 (4)  | C17-C18    | 1.453 (7)  |
| O1-C31        | 1.360 (3)  | C27-C28    | 1.443(7)   |
| O1-H1         | 0.877 (10) | N1-Ru1-N2  | 79.46 (15) |
| N1-C9         | 1.351 (4)  | N2-Ru1-N6  | 97.03 (16) |
| N1-C6         | 1.392 (3)  | N3-Ru1-N6  | 96.30 (16) |
| N2-C1         | 1.369 (4)  | N5-Ru1-N6  | 78.62 (17) |
| N2-C4         | 1.390 (4)  | N3-Ru1-N5  | 95.10 (16) |
| F2-B1-F1      | 107.6 (2)  | N3-Ru1-N4  | 78.40 (17) |
| F1-B1-N2      | 110.6 (2)  | N4-C18-C19 | 120.8 (5)  |
| F1-N1-B1      | 109.0 (3)  | N3-C17-C16 | 121.2 (5)  |
| N2-B1-N1      | 107.6 (2)  |            |            |
| C1-C18-C19    | 123.2 (3)  |            |            |
| C4-C5-C6      | 120.7 (3)  |            |            |
| C4-N2-C1      | 107.9 (2)  |            |            |
| C6-N1-B1      | 124.8 (2)  |            |            |
| C5-C28-C29    | 121.0 (3)  |            |            |
| C9-C10-C11    | 124.9 (3)  |            |            |
| C6-C5-C28-C29 | 99.8 (3)   |            |            |
| C4-C5-C28-C33 | 105.7 (3)  |            |            |
| C4-C5-C28-C29 | -77.8 (4)  |            |            |
| C6-C5-C28-C29 | 99.8 (3)   |            |            |
| C6-C5-C28-C33 | -76.7 (4)  |            |            |
| C6-N1-C9-C10  | -174.5 (3) |            |            |
| F1-B1-N1-C9   | 65.7 (4)   |            |            |
| F1-B1-N1-C6   | -119.2 (3) |            |            |

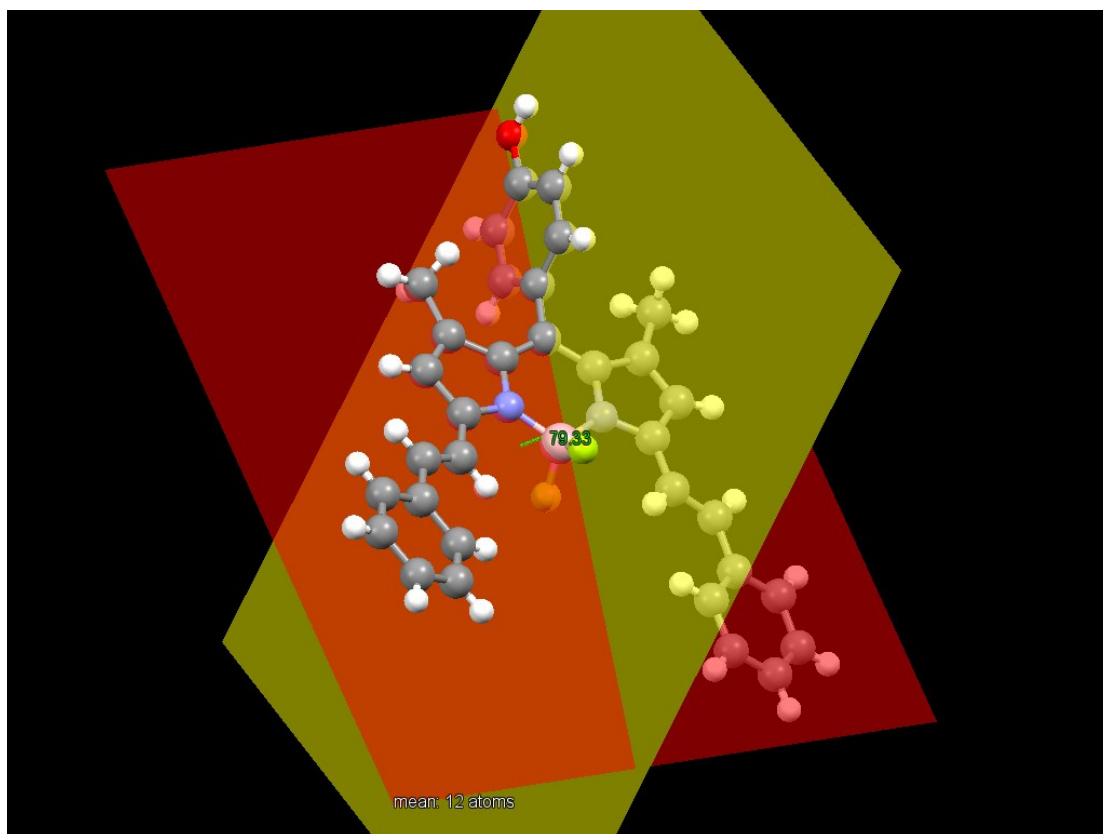

Fig. S16 The angle between the planes of BODIPY and phenol ring in BD.

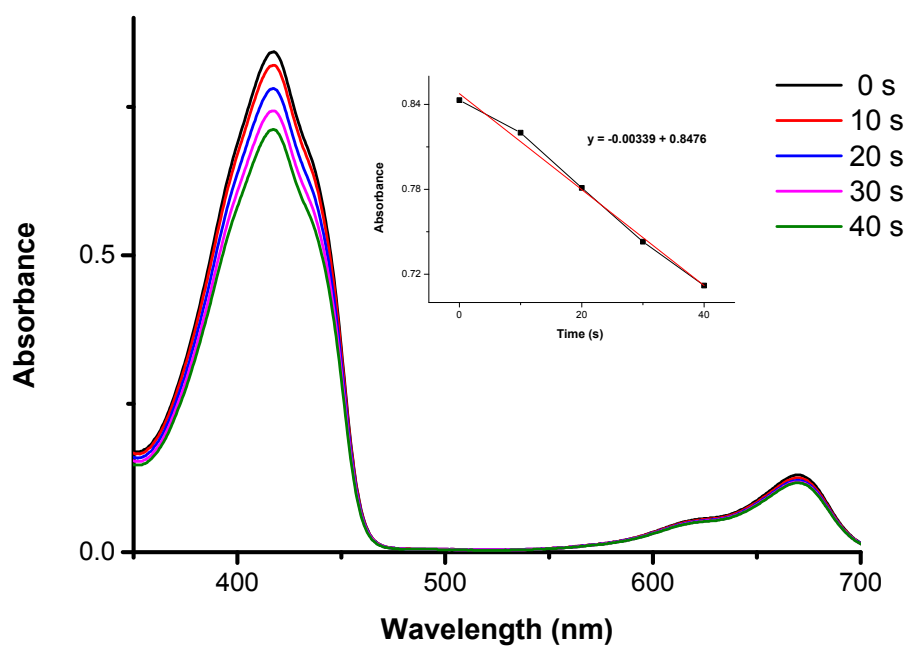

Fig. S17 UV-vis spectrum of methylene blue in DMSO.

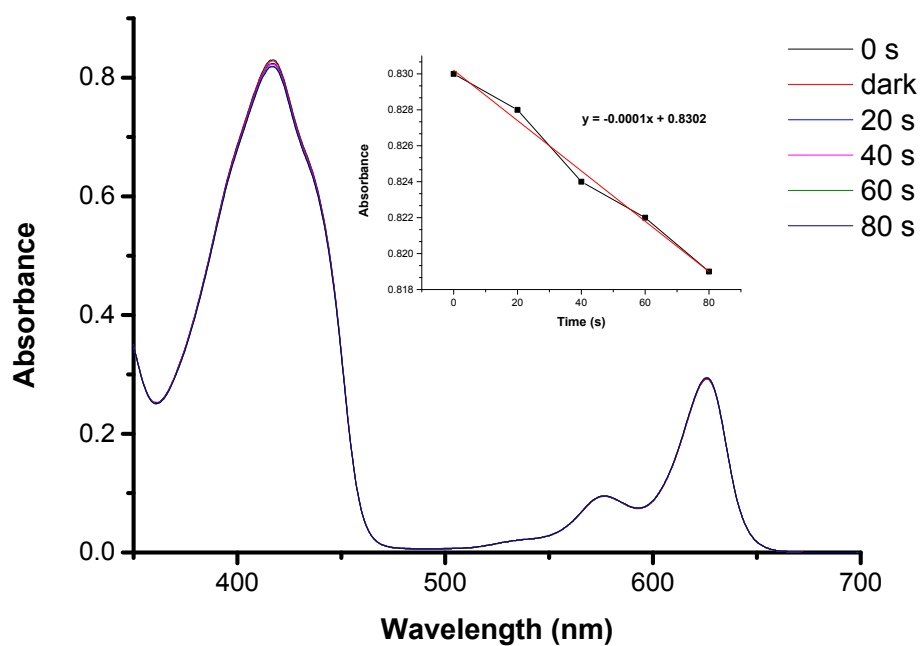

Fig. S18 UV-vis spectrum of BD in DMSO.

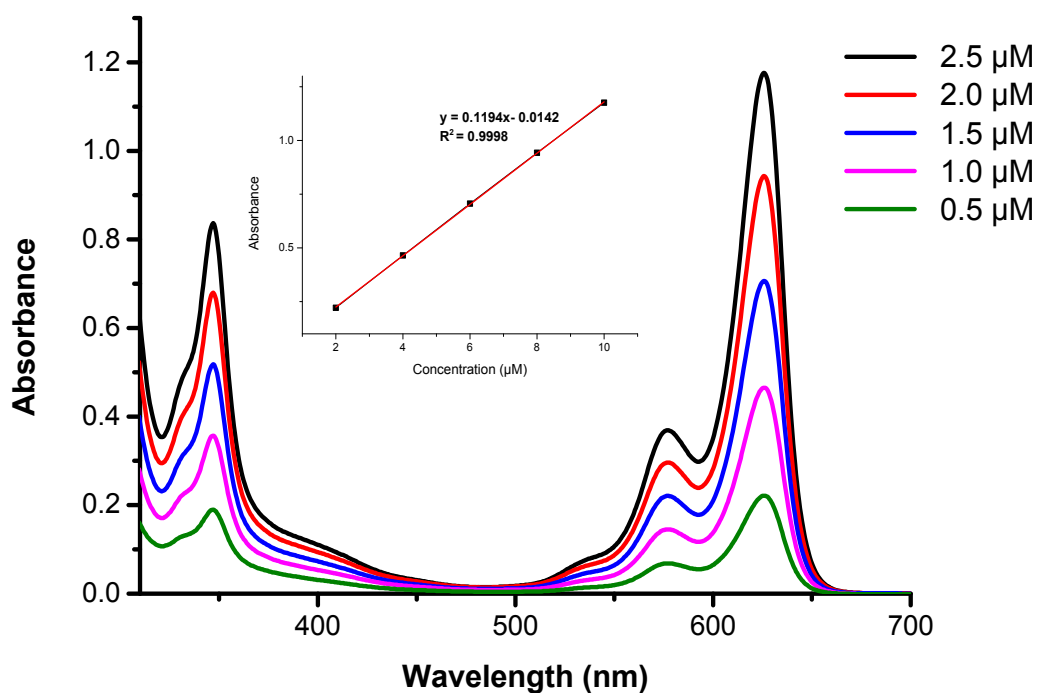

Fig. S19 UV-vis spectra of BD in DMSO at different concentrations between  $2.5 \times 10^{-6}$  M and  $0.5 \times 10^{-6}$  M.

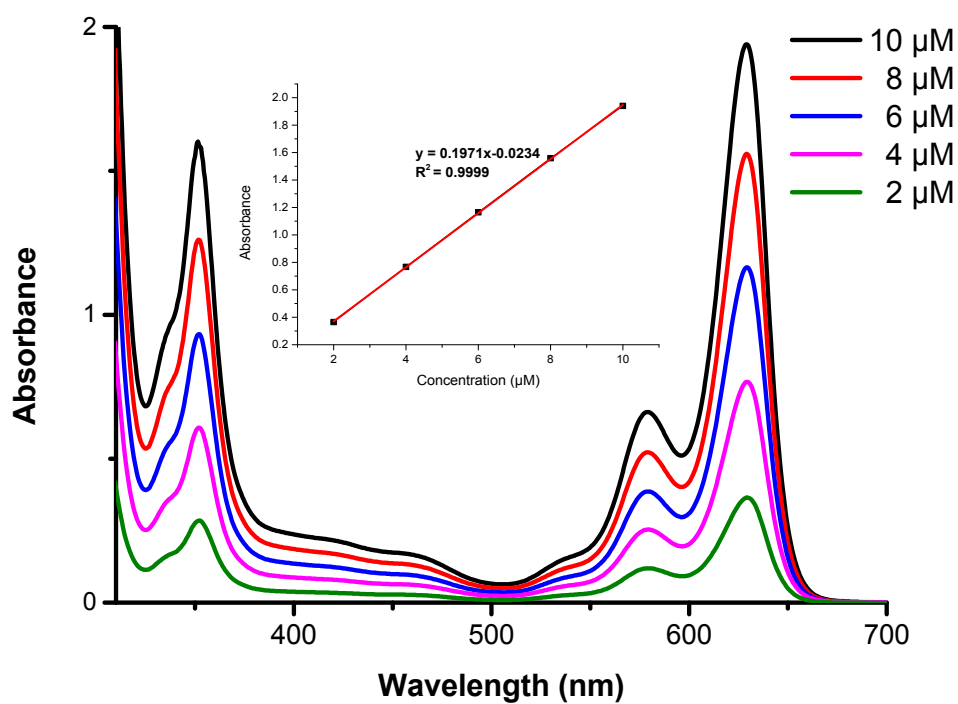

**Fig. S20** UV-vis spectra of **Ru-BD** in DMSO at different concentrations between  $2.5 \times 10^{-6}$  M and  $0.5 \times 10^{-6}$  M.

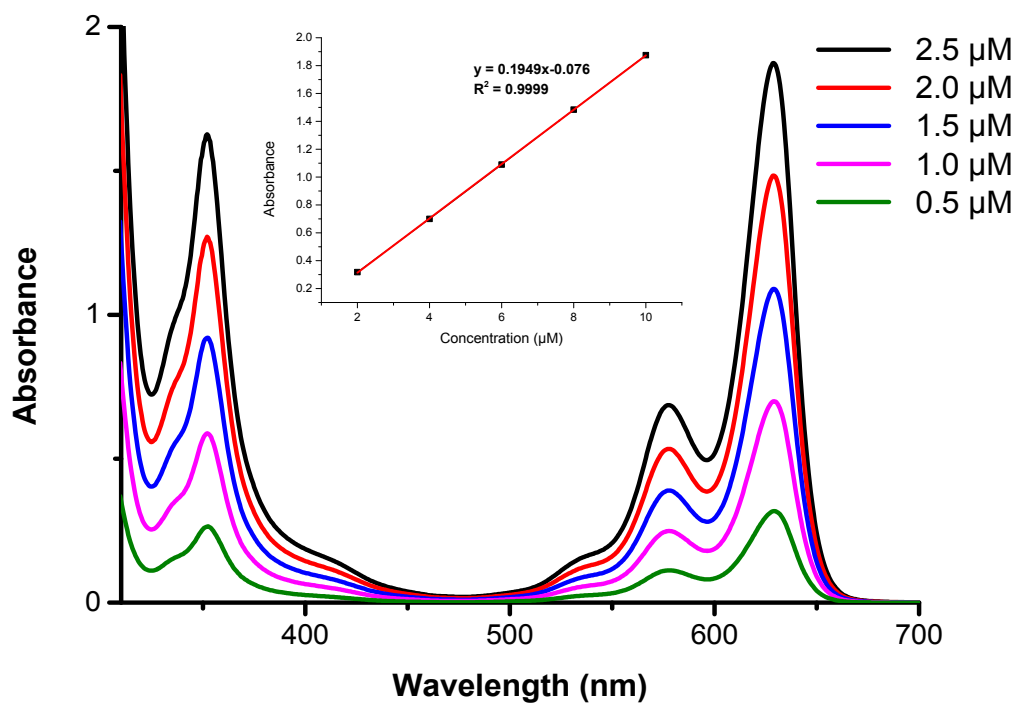

**Fig. S21** UV-vis spectra of **Ir-BD** in DMSO at different concentrations between  $2.5 \times 10^{-6}$  M and  $0.5 \times 10^{-6}$  M.

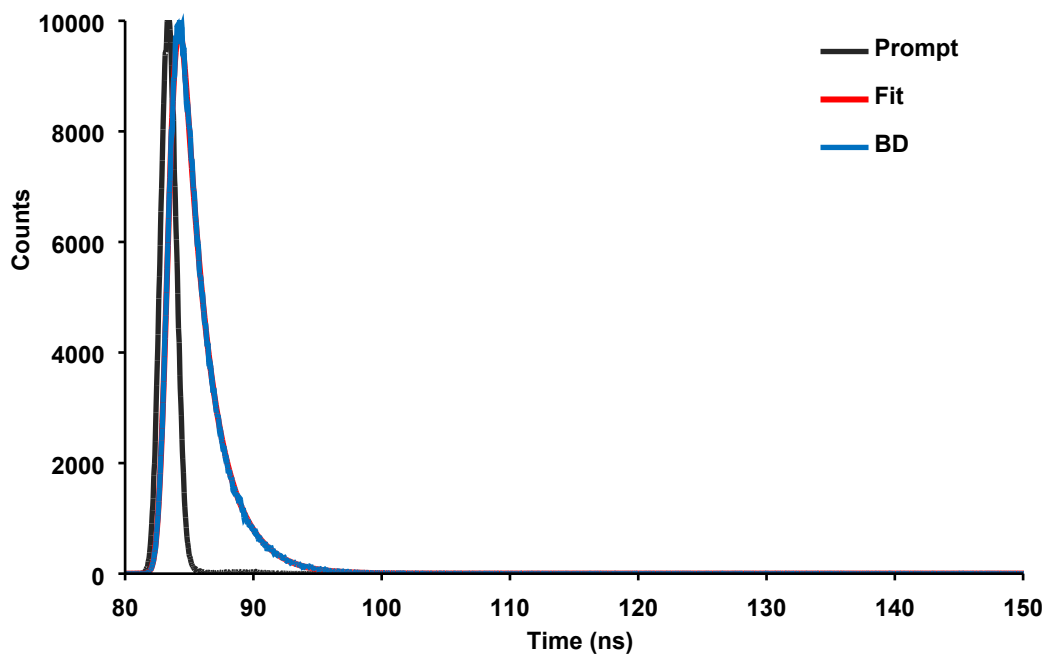

Fig. S22 Lifetime spectra of BD.

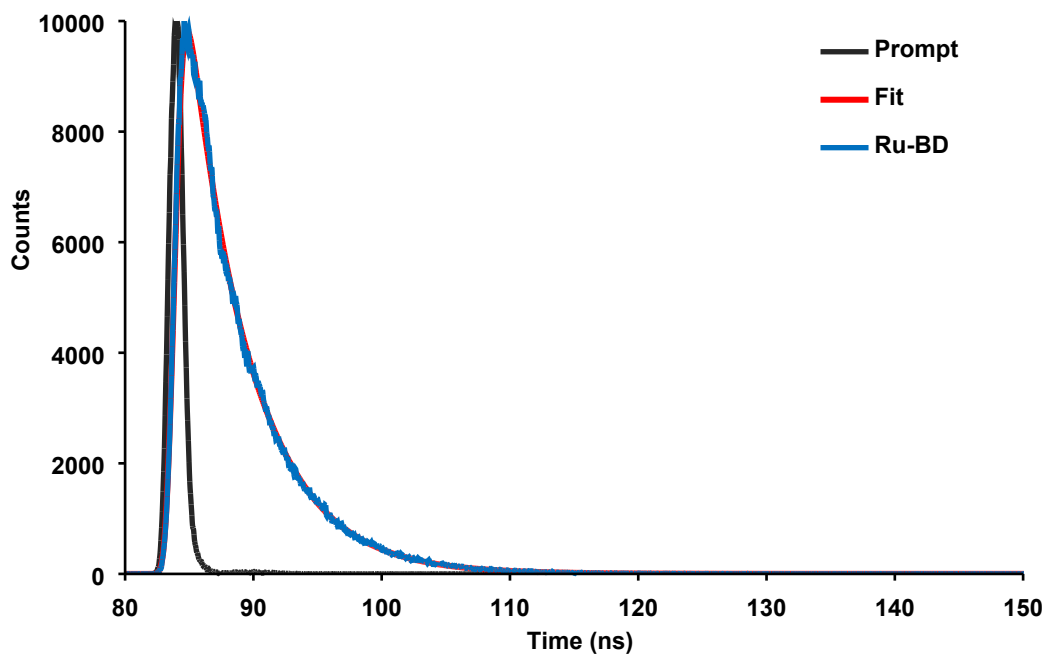

Fig. S23 Lifetime spectra of Ru-BD.

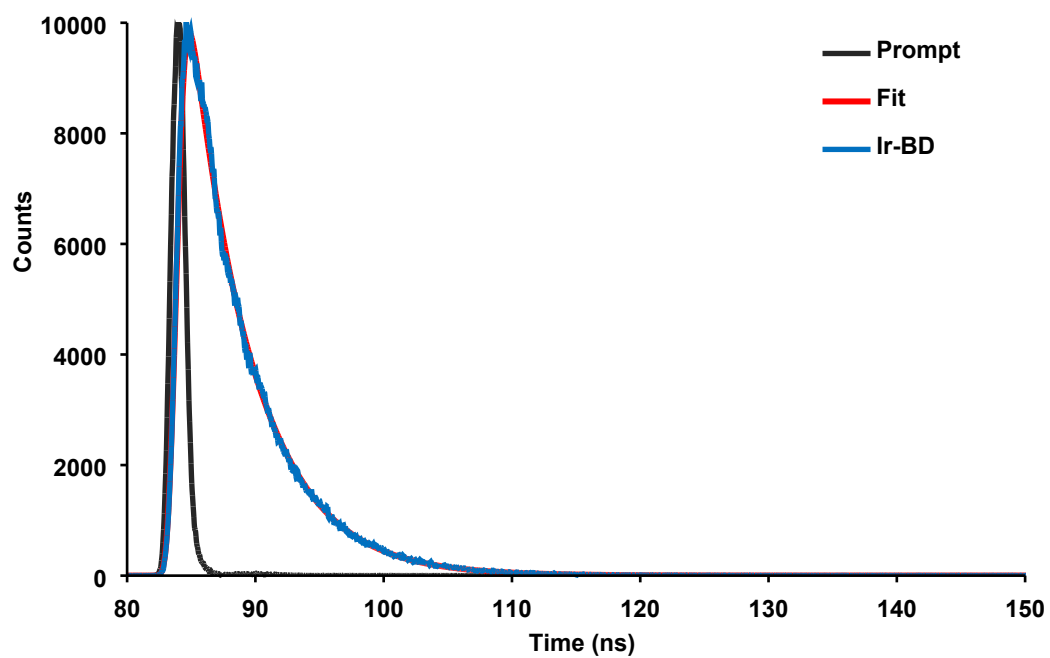

Fig. S24 Lifetime spectra of Ir-BD.
